# Supplementary material for: Integrated metabolic profiling and transcriptome analysis of pigment accumulation in diverse petal tissues in the lily cultivar ‘Vivian’
Source: PubMed Central journal article supplement (PMC7526134; doi:10.1186/s12870-020-02658-z), 2020-09-29

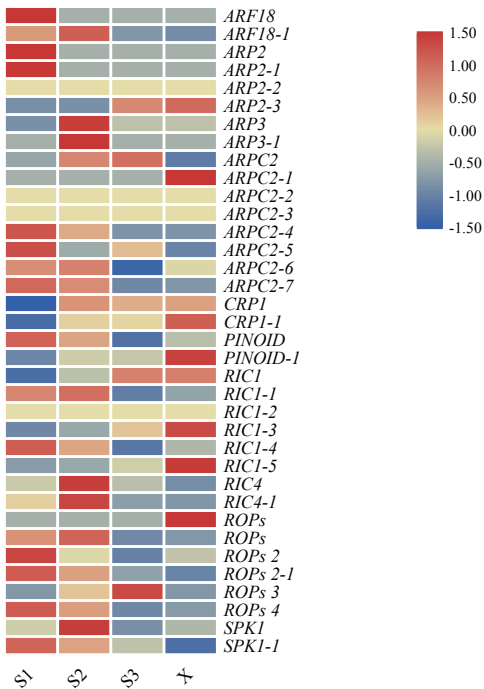

Supplement: 12870_2020_2658_MOESM14_ESM.pdf [file 12870_2020_2658_MOESM14_ESM.pdf]
